# Supplementary material for: CrnnCrispr: An Interpretable Deep Learning Method for CRISPR/Cas9 sgRNA On-Target Activity Prediction
Source: MDPI journal article supplement (doi:10.3390/ijms25084429), 2024-04-17
Supplement: s1 [file s1]

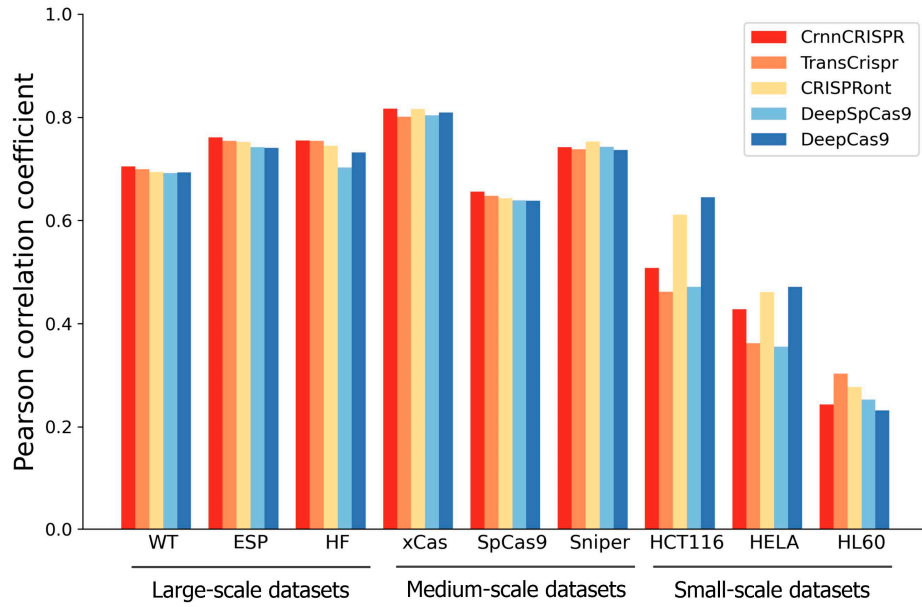

**Figure S1.** Performance comparison in terms of PCC of CrnnCrispr and four existing deep learning-based methods on nine datasets with various scales under a leave-one-cell-out procedure.

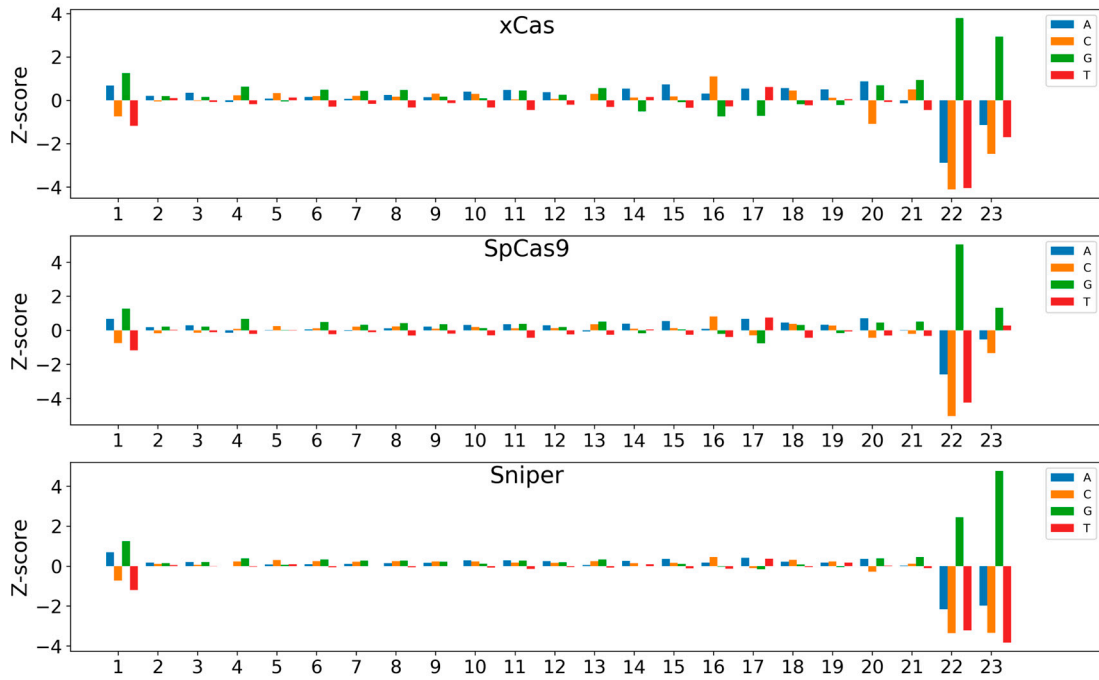

**Figure S2.** Impact of nucleotide composition of sgRNA activity on three medium-scale datasets. Bars show the Z-scores of nucleotide frequency for each position. The numbers below represent the positions of the sequence.

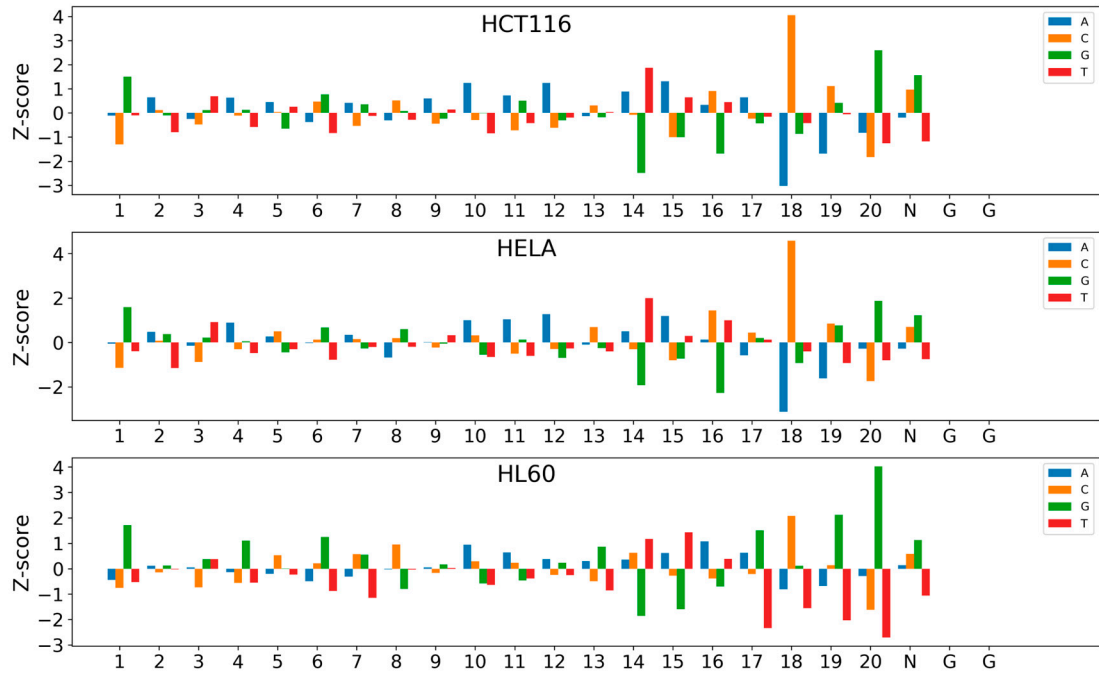

**Figure S3.** Impact of nucleotide composition of sgRNA activity on three small-scale datasets. Bars show the Z-scores of nucleotide frequency for each position. The numbers below represent the positions of the sequence.

|                  |   |   |   |   |   |   |   |   |   |    |    |    |    |    |    |    |    |    |    |    |    |    |    |
|------------------|---|---|---|---|---|---|---|---|---|----|----|----|----|----|----|----|----|----|----|----|----|----|----|
|                  | A | A | A | A | T | C | A | A | G | A  | C  | A  | T  | G  | G  | G  | C  | A  | C  | T  | G  | G  | G  |
| 1                | 2 | 2 | 2 | 2 | 5 | 3 | 2 | 2 | 4 | 2  | 3  | 2  | 5  | 4  | 4  | 4  | 3  | 2  | 3  | 5  | 4  | 4  | 4  |
| Label Encoding   |   |   |   |   |   |   |   |   |   |    |    |    |    |    |    |    |    |    |    |    |    |    |    |
| A                | 1 | 1 | 1 | 1 | 0 | 0 | 1 | 1 | 0 | 1  | 0  | 1  | 0  | 0  | 0  | 0  | 0  | 1  | 0  | 0  | 0  | 0  | 0  |
| C                | 0 | 0 | 0 | 0 | 0 | 1 | 0 | 0 | 0 | 0  | 0  | 0  | 0  | 0  | 0  | 0  | 1  | 0  | 1  | 0  | 0  | 0  | 0  |
| G                | 0 | 0 | 0 | 0 | 0 | 0 | 0 | 0 | 1 | 0  | 1  | 0  | 0  | 1  | 1  | 1  | 0  | 0  | 0  | 0  | 1  | 1  | 1  |
| T                | 0 | 0 | 0 | 0 | 1 | 0 | 0 | 0 | 0 | 0  | 0  | 0  | 1  | 0  | 0  | 0  | 0  | 0  | 0  | 1  | 0  | 0  | 0  |
|                  | 1 | 2 | 3 | 4 | 5 | 6 | 7 | 8 | 9 | 10 | 11 | 12 | 13 | 14 | 15 | 16 | 17 | 18 | 19 | 20 | 21 | 22 | 23 |
| One-hot Encoding |   |   |   |   |   |   |   |   |   |    |    |    |    |    |    |    |    |    |    |    |    |    |    |

**Figure S4.** An example of the one-hot encoding and label encoding representation schema for sgRNA.
